# Supplementary material for: Alkylammonium Halides for Phase Regulation and Luminescence Modulation of Cesium Copper Iodide Nanocrystals for Light-Emitting Diodes
Source: MDPI journal article supplement (doi:10.3390/molecules29051162), 2024-03-05
Supplement: s1 [file s1]

## **Electronic Supplementary Information (ESI)**

### **AAlkylammonium Halides for Phase Regulation and Luminescence Modulation of Cesium Copper Iodide Nanocrystals for Light-Emitting Diodes**

Wen Meng, Chuying Wang, Guangyong Xu, Guigen Luo and Zhengtao Deng \*

College of Engineering and Applied Sciences, State Key Laboratory of Analytical

Chemistry for Life Science, National Laboratory of Microstructures, Nanjing

University, Nanjing 210023, China;

17351930477@163.com (W.M.); wangchuying@yeah.net (C.W.);

xuguangyong@smail.nju.edu.cn (G.X.); 502022340061@smail.nju.edu.cn (G.L.)

\* Correspondence: dengz@nju.edu.cn

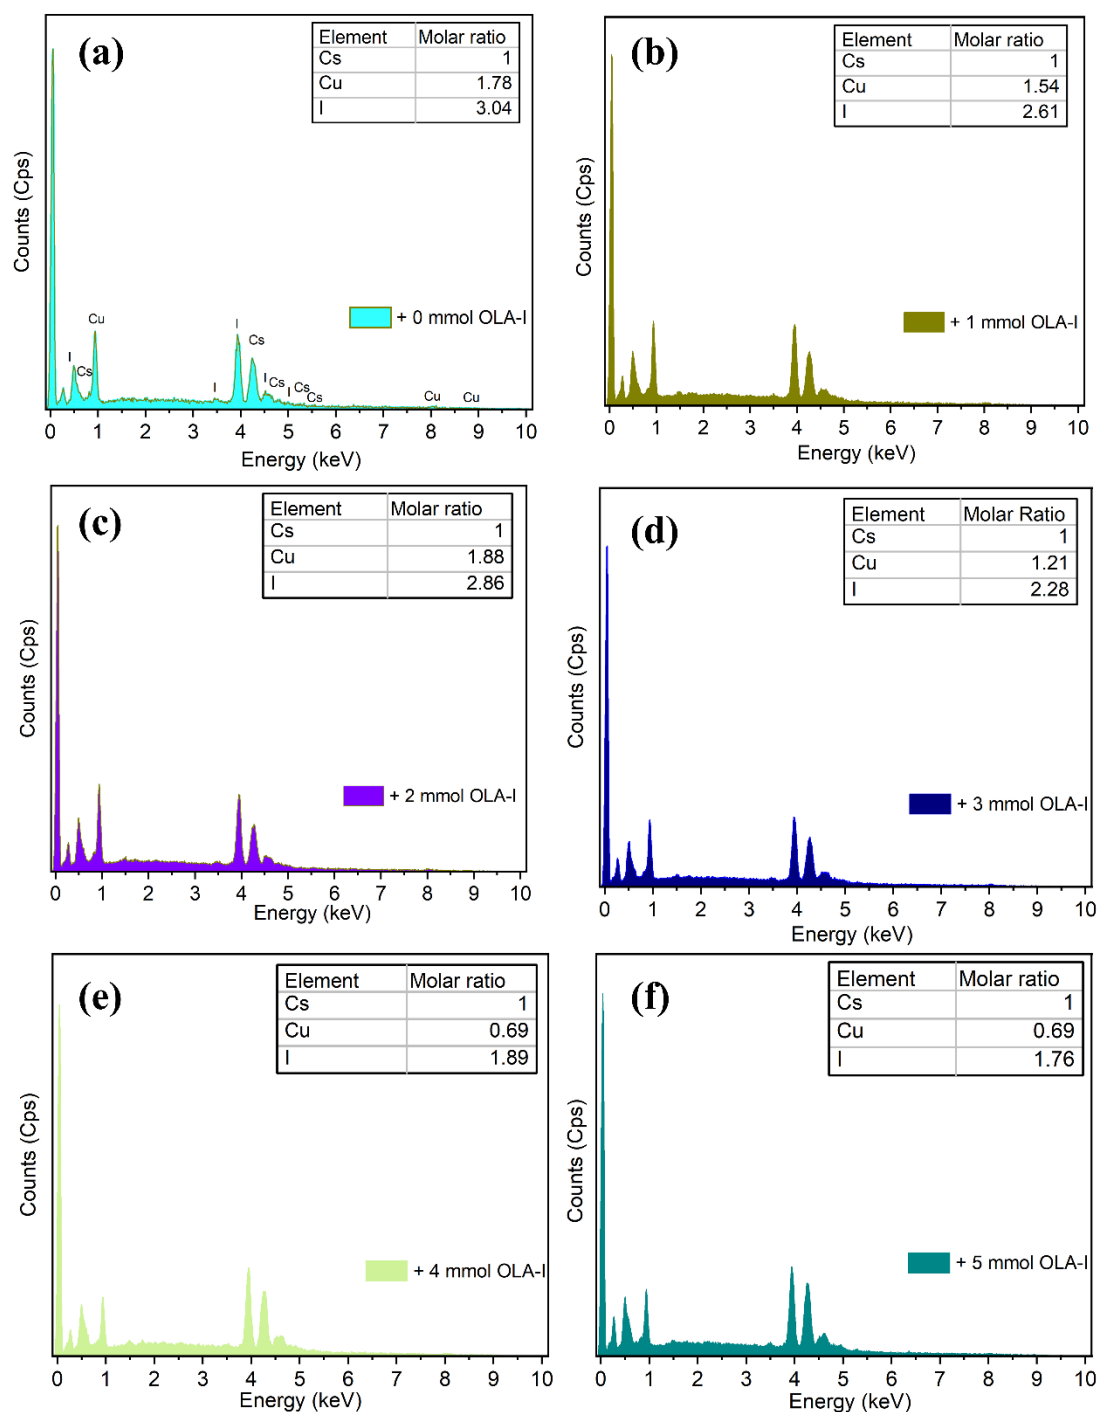

**Figure S1.** The Energy dispersive spectra (EDS) and corresponding elemental content of compounds obtained with different molar ratio OLA-I added: (a-f) 0 mmol; 1 mmol; 2 mmol; 3 mmol; 4 mmol and 5 mmol OLA-I.

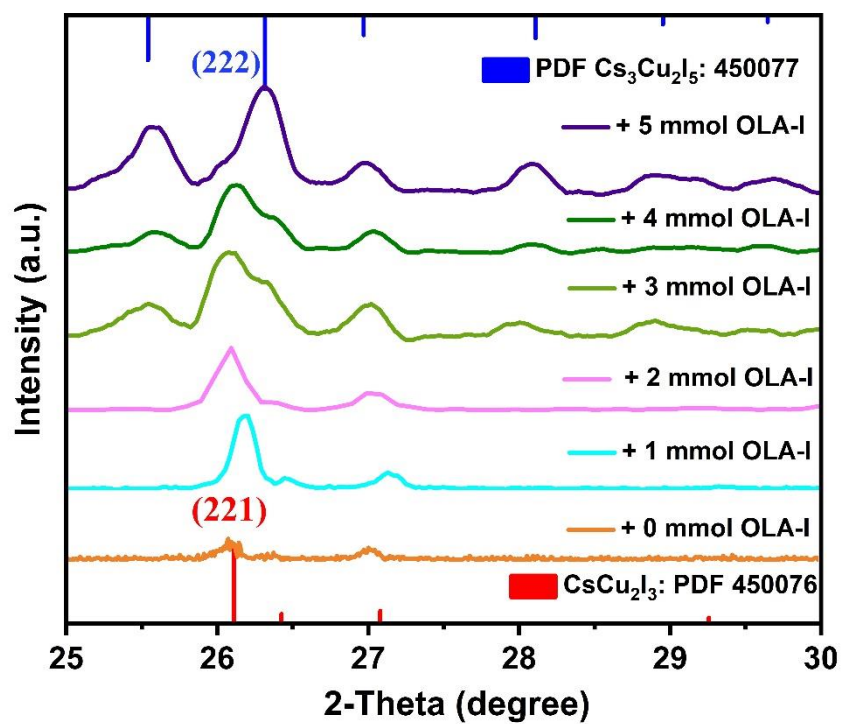

**Figure S2.** XRD patterns of the samples with enlarged views from 25° to 30°.

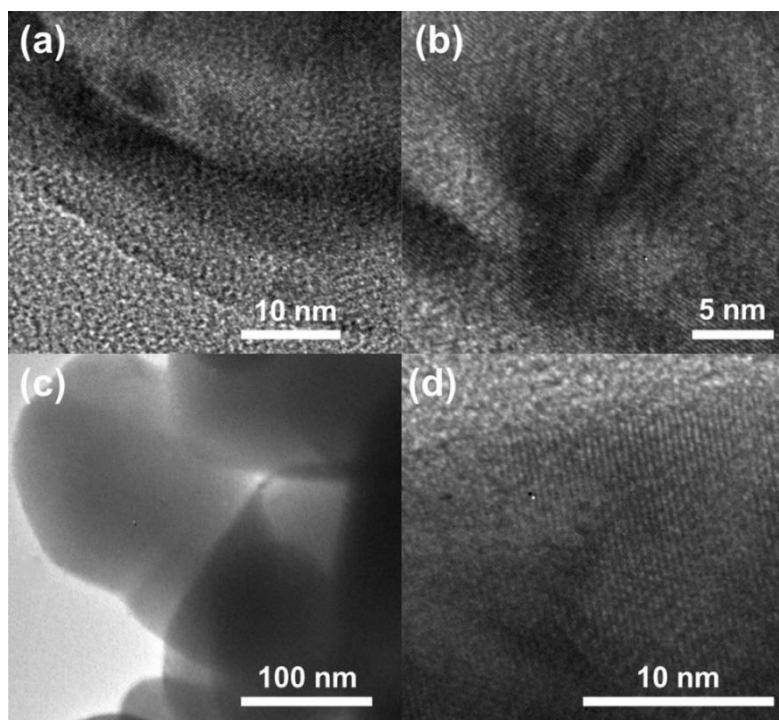

**Figure S3.** The transmission electron microscope (TEM) images of CsCu<sub>2</sub>I<sub>3</sub> MRs (a) low-resolution and (b) high-resolution; TEM images of Cs<sub>3</sub>Cu<sub>2</sub>I<sub>5</sub> NCs (c) low-resolution image and (d) high-resolution image.

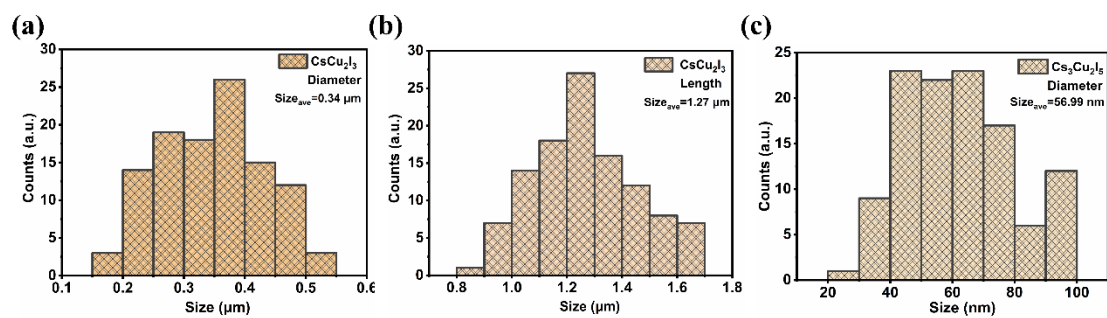

**Figure S4.** (a-b) The diameter and length distribution statistics of CsCu<sub>2</sub>I<sub>3</sub> MRs obtained through 1 mmol OLA-I added. (c) The particles size of diameter distribution statistic of Cs<sub>3</sub>Cu<sub>2</sub>I<sub>5</sub> NCs.

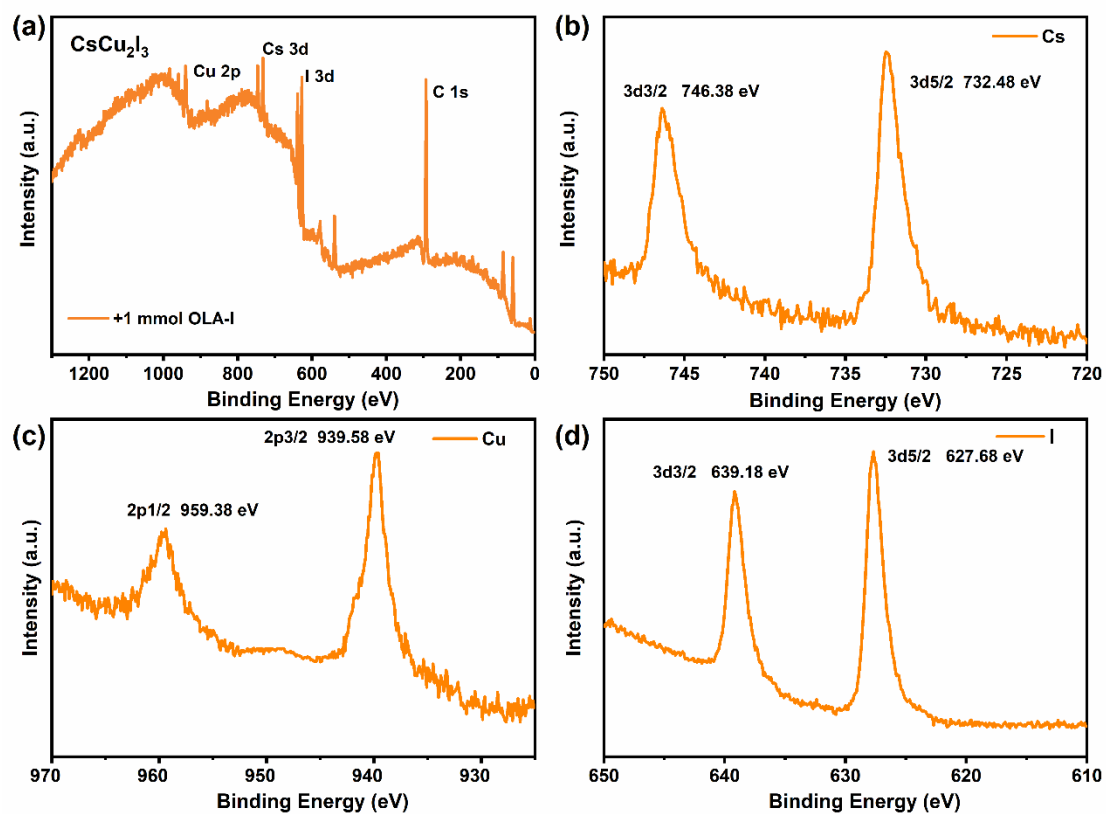

**Figure S5.** (a) XPS survey spectrum of  $\text{CsCu}_2\text{I}_3$ . And the high-resolution spectra corresponding to the curves of (b) Cs 3d, (c) Cu 2p and (d) I 3d orbitals.

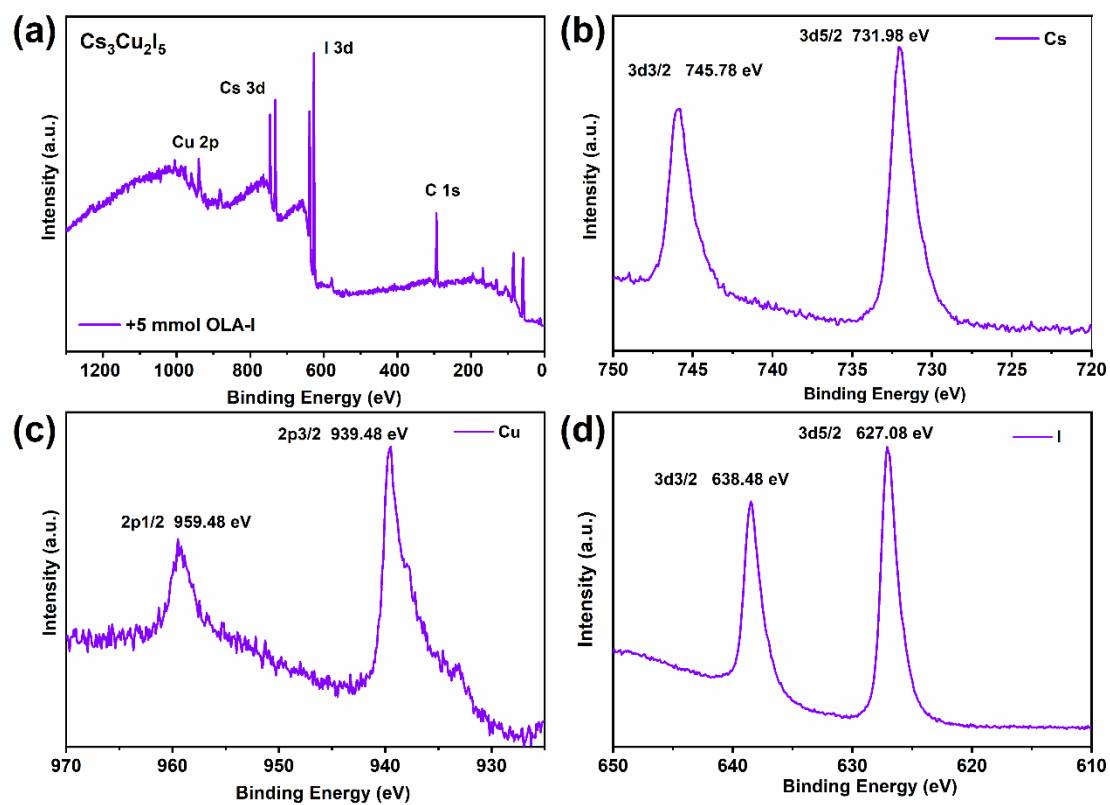

**Figure S6.** (a) XPS survey spectrum of  $\text{Cs}_3\text{Cu}_2\text{I}_5$ . And the high-resolution XPS spectra of (b) Cs 3d, (c) Cu 2p and (d) I 3d orbitals.

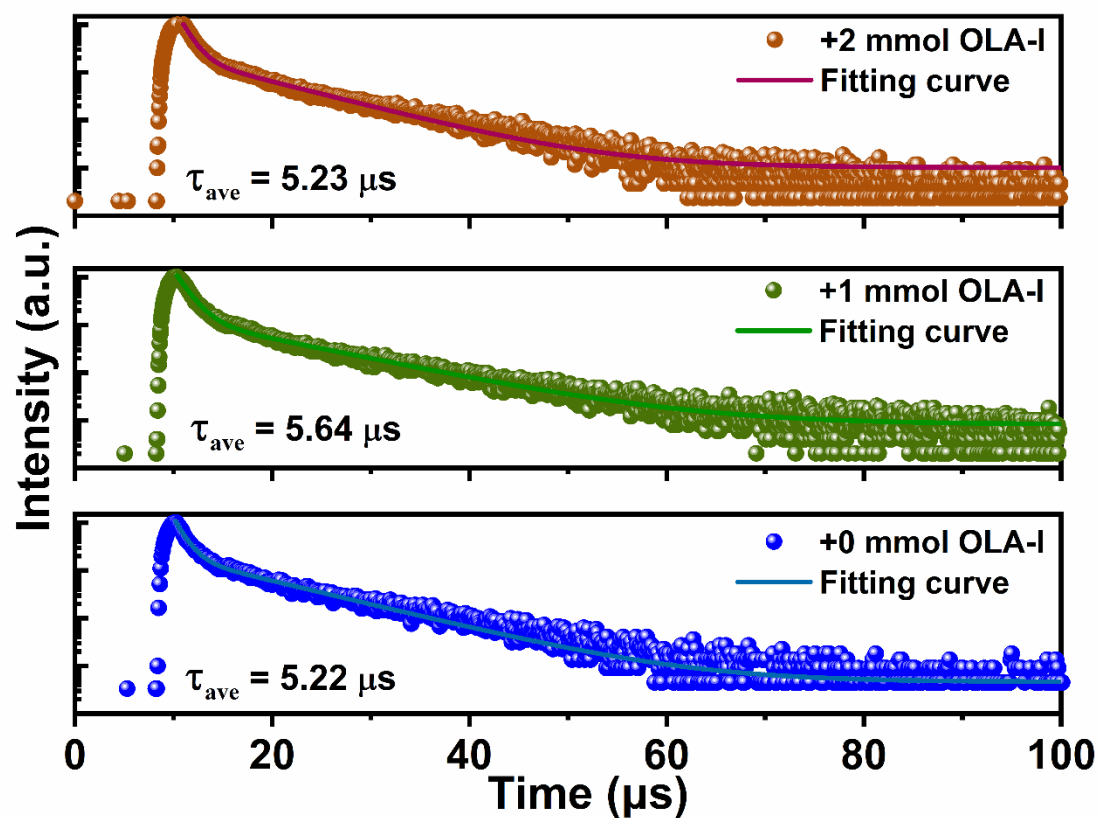

**Figure S7.** Time-resolved PL decay curves at room temperature for  $\text{CsCu}_2\text{I}_3$  (adding 0 mmol, 1 mmol and 2 mmol OLA-I) compound and solid lines represent the fitting curves by a double exponential function.



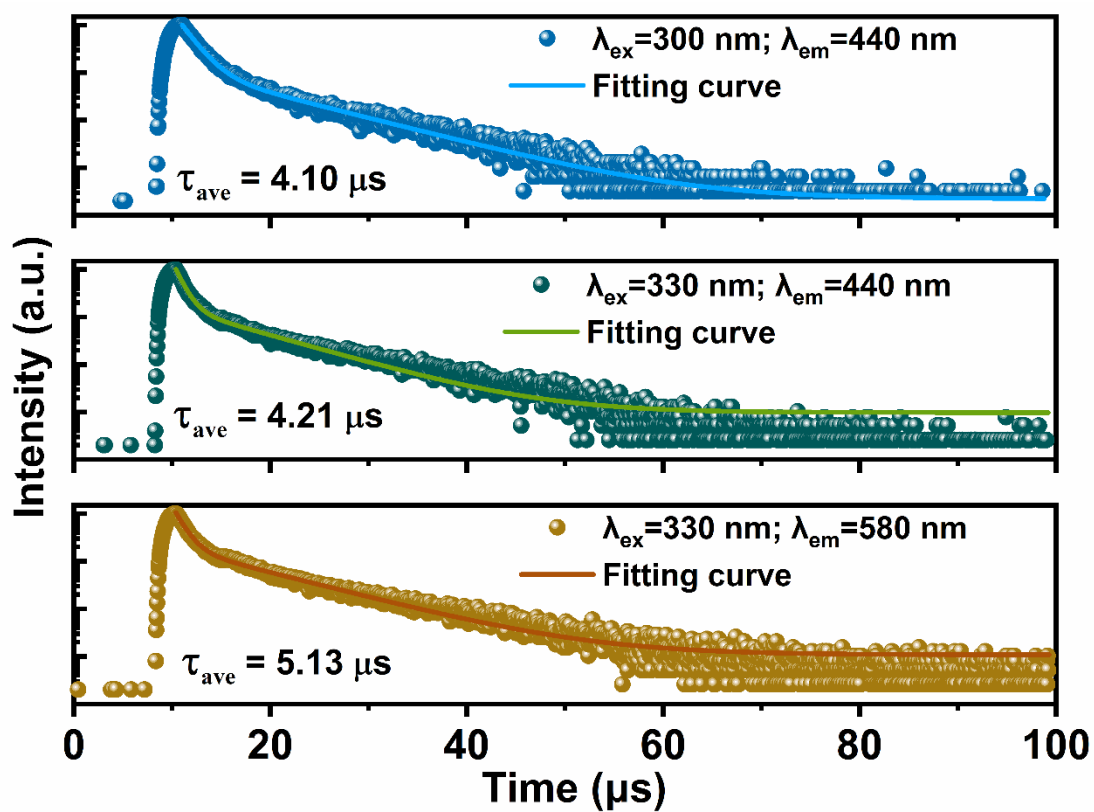

**Figure S8.** Time-resolved PL decay curves at room temperature for CsCu<sub>2</sub>I<sub>3</sub>/Cs<sub>3</sub>Cu<sub>2</sub>I<sub>5</sub> (adding 4 mmol OLA-I) compound and solid lines represent the fitting curves by a double exponential function.

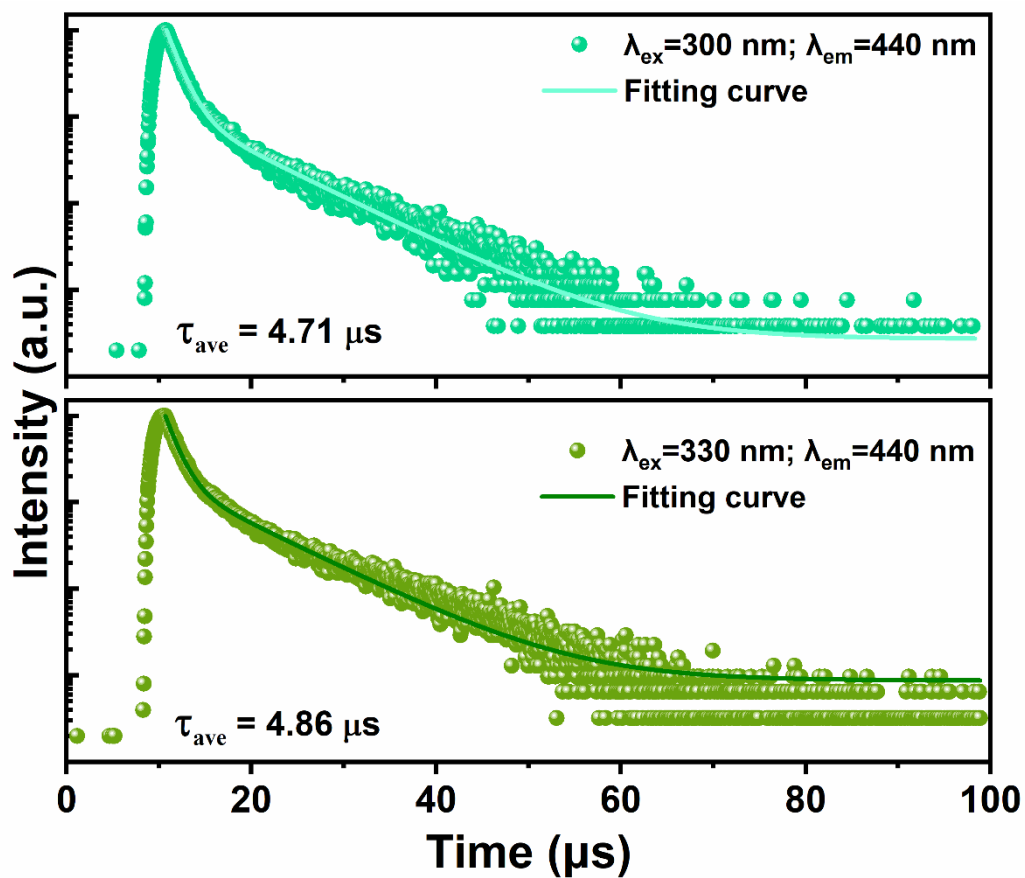

**Figure S9.** Time-resolved PL decay curves at room temperature for  $\text{Cs}_3\text{Cu}_2\text{I}_5$  (adding 5 mmol OLA-I) compound and solid lines represent the fitting curves by a double exponential function.

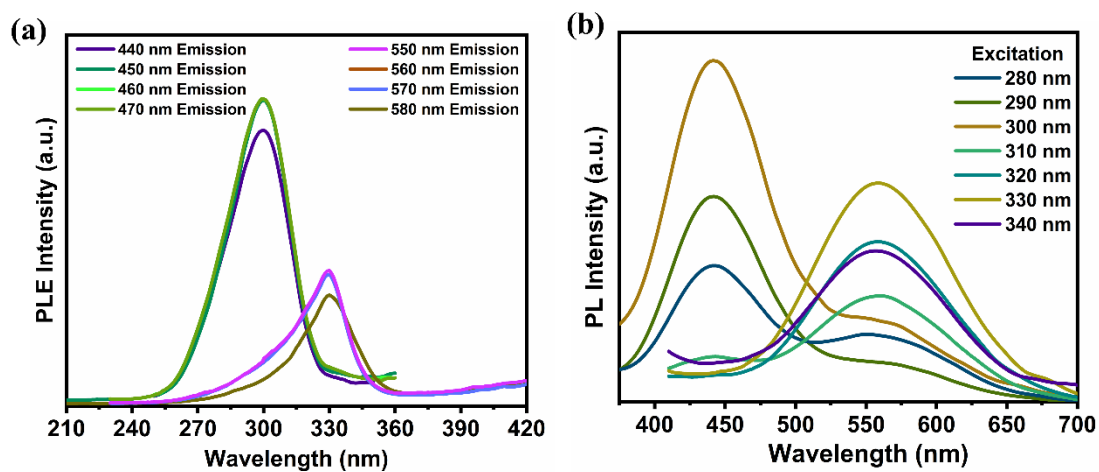

**Figure S10.** (a) PLE spectra of  $\text{CsCu}_2\text{I}_3/\text{Cs}_3\text{Cu}_2\text{I}_5$  compound for different emission wavelengths. (b) PL spectra of  $\text{CsCu}_2\text{I}_3/\text{Cs}_3\text{Cu}_2\text{I}_5$  compound upon UV irradiation with different excitation wavelengths.

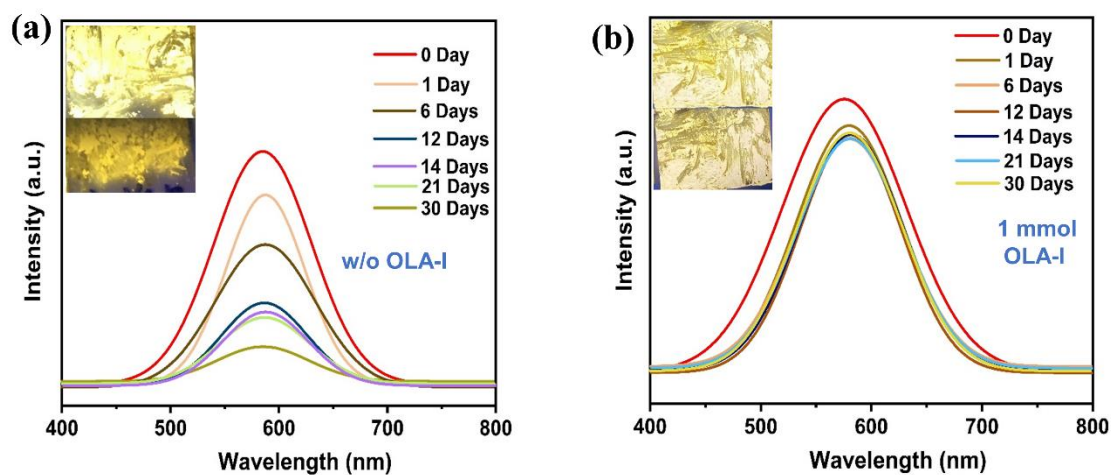

**Figure S11.** (a) Evolution of the PL spectra of 0 mmol OLA-I treated  $\text{CsCu}_2\text{I}_3$  under 85 °C over 30 days for stability investigation. (b) Evolution of the PL spectra of 1 mmol OLA-I treated  $\text{CsCu}_2\text{I}_3$  over 30 days for stability investigation (Inserted images representing the luminance changing under 85 °C environment. Above: for 0 day; Down: for 30 days).

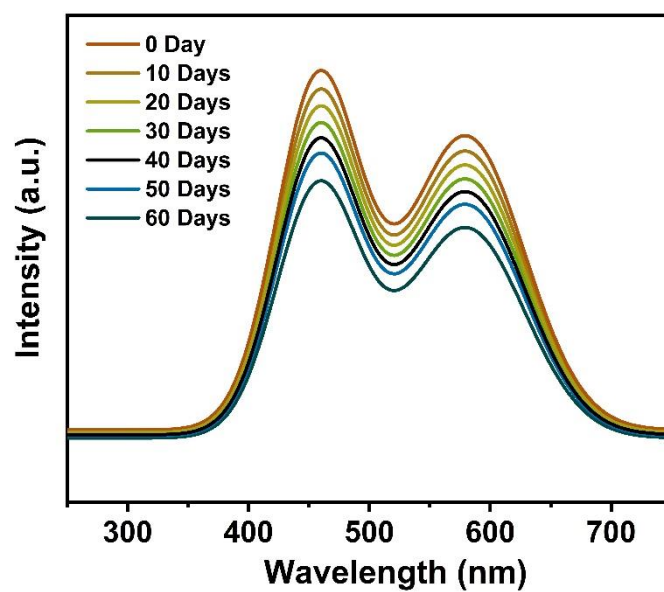

**Figure S12.** PL emission spectrum of the obtained compound with adding 3 mmol OLA-I exposed to air for 60 days.

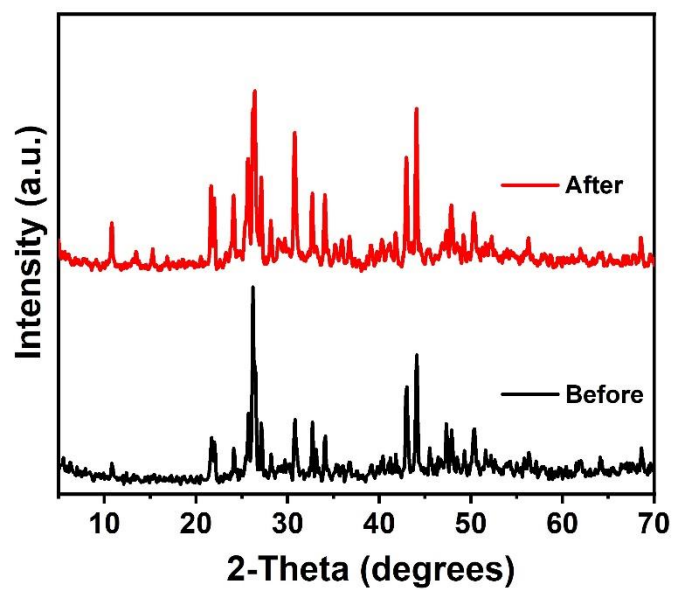

**Figure S13.** XRD patterns of 3 mmol OLA-I treated  $\text{CsCu}_2\text{I}_3/\text{Cs}_3\text{Cu}_2\text{I}_5$  component before and after storage under the ambient condition for two months.

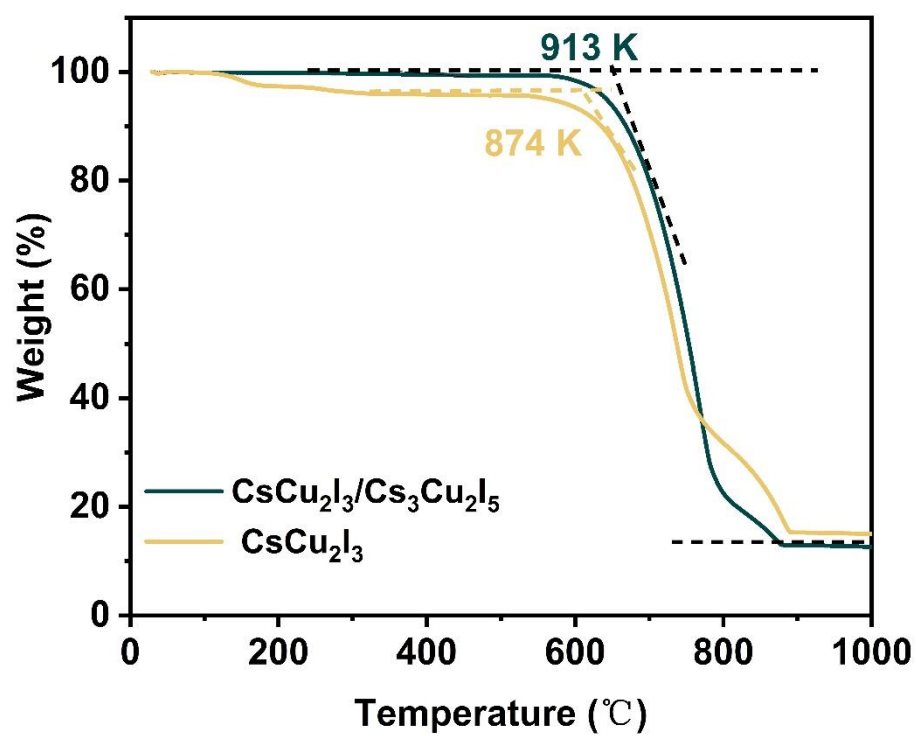

**Figure S14.** Thermogravimetric analysis (TGA) of  $\text{CsCu}_2\text{I}_3$  and  $\text{CsCu}_2\text{I}_3/\text{Cs}_3\text{Cu}_2\text{I}_5$ .

**Table S1.** Element analysis measurement results and the calculated ratios of Cs, Cu and I for prepared samples with adding different molar ratio of OLA-I (Ratio of inputting amounts for Cs: Cu: I=3.2: 4: 4).

| <b>+ x mmol<br/>OLA-I</b> | <b>Cs (%)</b> | <b>Cu (%)</b> | <b>I (%)</b> | <b>Ratio</b> | <b>Component</b>                                                                         |
|---------------------------|---------------|---------------|--------------|--------------|------------------------------------------------------------------------------------------|
| <b>+ 0 mmol</b>           | 13.8          | 24.6          | 41.9         | 1:1.78:3.04  | <b>CsCu<sub>2</sub>I<sub>3</sub></b>                                                     |
| <b>+ 1 mmol</b>           | 14.2          | 21.8          | 36.9         | 1:1.54:2.61  | <b>CsCu<sub>2</sub>I<sub>3</sub></b>                                                     |
| <b>+ 2 mmol</b>           | 12.5          | 23.5          | 35.7         | 1:1.88:2.86  | <b>CsCu<sub>2</sub>I<sub>3</sub></b>                                                     |
| <b>+ 3 mmol</b>           | 15.7          | 19.0          | 35.8         | 1:1.21:2.28  | <b>CsCu<sub>2</sub>I<sub>3</sub></b><br><b>Cs<sub>3</sub>Cu<sub>2</sub>I<sub>5</sub></b> |
| <b>+ 4 mmol</b>           | 22.1          | 15.3          | 41.7         | 1:0.69:1.89  | <b>CsCu<sub>2</sub>I<sub>3</sub></b><br><b>Cs<sub>3</sub>Cu<sub>2</sub>I<sub>5</sub></b> |
| <b>+ 5 mmol</b>           | 20.2          | 13.9          | 35.6         | 1:0.69:1.76  | <b>Cs<sub>3</sub>Cu<sub>2</sub>I<sub>5</sub></b>                                         |



**Table S2.** Summary of the synthetic strategies and optical parameters of recent reported copper-based halide compounds.

| Formula                                                                        | Morphology                         | Method                   | Emission peak (nm) | PLQY (%)    | Ref.             |
|--------------------------------------------------------------------------------|------------------------------------|--------------------------|--------------------|-------------|------------------|
| CsCu <sub>2</sub> I <sub>3</sub>                                               | NA                                 | Solid-state reaction     | 576                | 3.23        | [1]              |
| CsCu <sub>2</sub> I <sub>3</sub>                                               | Thin films                         | Spin-coating             | ~ 548              | 20.6        | [2]              |
| CsCu <sub>2</sub> I <sub>3</sub>                                               | Micro-rods                         | Antisolvent infiltration | 575                | 12.1        | [3]              |
| CsCu <sub>2</sub> I <sub>3</sub>                                               | Nanorods                           | Hot injection            | 553                | 5           | [4]              |
| CsCu <sub>2</sub> I <sub>3</sub>                                               | Nanorods                           | Hot injection            | 561                | 11          | [5]              |
| CsCu <sub>2</sub> I <sub>3</sub>                                               | Wires                              | Antisolvent              | 570                | NA          | [6]              |
| Cs <sub>3</sub> Cu <sub>2</sub> I <sub>5</sub>                                 | Nanocrystals                       | Hot injection            | 441                | 67          | [4]              |
| Cs <sub>3</sub> Cu <sub>2</sub> I <sub>5</sub>                                 | Nanocrystals                       | Modified hot injection   | 445                | 73.7        | [7]              |
| Cs <sub>3</sub> Cu <sub>2</sub> I <sub>5</sub>                                 | Powder                             | Solution stirring        | 440                | NA          | [8]              |
| Cs <sub>3</sub> Cu <sub>2</sub> I <sub>5</sub> : Mn                            | Microparticles                     | Solid-state reaction     | 448 and 556        | 57          | [9]              |
| Cs <sub>3</sub> Cu <sub>2</sub> I <sub>5</sub>                                 | Nanocrystals                       | Hot injection            | 441                | 67          | [10]             |
| Cs <sub>5</sub> Cu <sub>3</sub> Cl <sub>6</sub> I <sub>2</sub>                 | Powder                             | Solid-state reaction     | 462                | 95          | [11]             |
| <b>CsCu<sub>2</sub>I<sub>3</sub></b>                                           | <b>Micro-rods</b>                  | <b>Hot injection</b>     | <b>560</b>         | <b>47.3</b> | <b>This work</b> |
| <b>CsCu<sub>2</sub>I<sub>3</sub>/Cs<sub>3</sub>Cu<sub>2</sub>I<sub>5</sub></b> | <b>Micro-rods and Nanocrystals</b> | <b>Hot injection</b>     | <b>560 and 440</b> | <b>66.4</b> | <b>This work</b> |
| <b>Cs<sub>3</sub>Cu<sub>2</sub>I<sub>5</sub></b>                               | <b>Nanocrystals</b>                | <b>Hot injection</b>     | <b>440</b>         | <b>95.3</b> | <b>This work</b> |

## Additional References

- [1] R. Roccanova, A. Yangui, G. Seo, T. D. Creason, Y. Wu, D. Y. Kim, M.-H. Du, B. Saparov, *ACS Materials Letters* **2019**, *1*, 459.
- [2] Z. Ma, Z. Shi, C. Qin, M. Cui, D. Yang, X. Wang, L. Wang, X. Ji, X. Chen, J. Sun, D. Wu, Y. Zhang, X. J. Li, L. Zhang, C. Shan, *ACS Nano* **2020**, *14*, 4475.
- [3] S. Fang, Y. Wang, H. Li, F. Fang, K. Jiang, Z. Liu, H. Li, Y. Shi, *Journal of Materials Chemistry C* **2020**, *8*, 4895.
- [4] P. Cheng, L. Sun, L. Feng, S. Yang, Y. Yang, D. Zheng, Y. Zhao, Y. Sang, R. Zhang, D. Wei, W. Deng, K. Han, *Angewandte Chemie International Edition* **2019**, *58*, 16087.
- [5] P. Vashishtha, G. V. Nutan, B. E. Griffith, Y. Fang, D. Giovanni, M. Jagadeeswararao, T. C. Sum, N. Mathews, S. G. Mhaisalkar, J. V. Hanna, T. White, *Chemistry of Materials* **2019**, *31*, 9003.
- [6] X. Xing, T. Tong, M. Mohebinia, D. Wang, Z. Ren, V. G. Hadjiev, Z. Wang, J. Bao, *The Journal of Physical Chemistry Letters* **2022**, *13*, 6447.
- [7] L. Lian, M. Zheng, W. Zhang, L. Yin, X. Du, P. Zhang, X. Zhang, J. Gao, D. Zhang, L. Gao, G. Niu, H. Song, R. Chen, X. Lan, J. Tang, J. Zhang, *Advanced Science* **2020**, *7*, 2000195.
- [8] X. Zhang, B. Zhou, X. Chen, W. W. Yu, *Inorganic Chemistry* **2022**, *61*, 399.
- [9] P. Du, P. Cai, W. Li, L. Luo, Y. Hou, Z. Liu, *Microchimica Acta* **2019**, *186*, 730.
- [10] L. Liu, D. Zhou, L. Zi, R. Sun, S. Liu, B. Liu, Z. Shi, D. Liu, H. Song, *Solar RRL* **2022**, *6*, 2200025.
- [11] J. Li, T. Inoshita, T. Ying, A. Ooishi, J. Kim, H. Hosono, *Advanced Materials* **2020**, *32*, 2002945.
